# Supplementary material
Source: PubMed Central journal article supplement (PMC11071901)
Supplement: 18_2021_4125_MOESM1_ESM.pdf [file 18_2021_4125_MOESM1_ESM.pdf]

## Supplementary Data for

### Cellular and Molecular Life Sciences

#### Circulating cardiomyocyte-derived extracellular vesicles reflect cardiac injury during systemic inflammatory response syndrome in mice

Hargita Hegyesi<sup>1</sup>, Éva Pallinger<sup>1</sup>, Szabina Mecsei<sup>1</sup>, Balázs Hornyák<sup>1</sup>, Csenger Kovácsházi<sup>2</sup>, Gábor B Brenner<sup>2</sup>, Zoltán Giricz<sup>2</sup>, Krisztina Pálóczi<sup>1</sup>, Ágnes Kittel<sup>3</sup>, József Tóvári<sup>4</sup>, Lilla Turiak<sup>5</sup>, Delaram Khamari<sup>1</sup>, Péter Ferdinandy<sup>2,7</sup>, Edit I. Buzás<sup>1,6,8</sup>

<sup>1</sup> Semmelweis University, Department of Genetics, Cell- and Immunobiology, Budapest, Hungary

<sup>2</sup> Semmelweis University, Department of Pharmacology and Pharmacotherapy, Budapest, Hungary

<sup>3</sup> Institute of Experimental Medicine, Eötvös Loránd Research Network, Budapest, Hungary

<sup>4</sup> National Institute of Oncology, Department of Experimental Pharmacology, Budapest, Hungary

<sup>5</sup> MS Proteomics Research Group, Research Centre for Natural Sciences, Eötvös Loránd Research Network, Budapest, Hungary

<sup>6</sup> ELKH-SE Immune-Proteogenomics Extracellular Vesicle Research Group, Budapest, Hungary

<sup>7</sup> Pharmahungary Group, H-6722 Szeged, Hungary<sup>8</sup> Hungarian Centre of Excellence for Molecular Medicine (HCEMM) – Semmelweis University Extracellular Vesicle Research Group, Budapest, Hungary

#### Corresponding author:

Hargita Hegyesi, [hegyesi.hargita@med.semmelweis-univ.hu](mailto:hegyesi.hargita@med.semmelweis-univ.hu)

**Supplementary Table I. List of antibodies used for immunofluorescence studies**

| Antibodies       | Conjugate      | Supplier      | Clone      | Species | Dilution |
|------------------|----------------|---------------|------------|---------|----------|
| Albumin          | No             | abcam         | ab207327   | rabbit  | 1:100    |
| HSP-70           | No             | invitrogen    | Ma3-006    | mouse   | 1:100    |
| PYGM             | FITC           | Biorbyt       | orb9674    | rabbit  | 1:100    |
| PYGM             | No             | FineTest      | FNab06977  | rabbit  | 1:100    |
| CPN1             | No             | AntibodyGenie | CAB78887   | rabbit  | 1:100    |
| CLU              | No             | AntibodyGenie | CAB12913   | rabbit  | 1:100    |
| CD63             | APC            | Sony          | 1319525    | rat     | 1:100    |
| CD63             | PE             | Sony          | 143903     | rat     | 1:100    |
| CD9              | APC            | Sony          | 1224060    | rat     | 1:100    |
| CD81             | PE             | Sony          | 1124530    | hamster | 1:100    |
| CD63             | No             | Santa Cruze   | sc-15363   | rabbit  | 1:50     |
| CD81             | No             | Sigma         | SAB3500454 | rabbit  | 1:50     |
| alpha-actinin    | FITC           | Frank         | 106936     | human   | 1:1000   |
| cTnl             | biotin         | Abbexa        | abx272698  | rabbit  | 1:100    |
| Alix             | No             | Sigma         | SAB4200477 | rabbit  | 1:50     |
| Caveolin-3       | No             | ThermoFisher  | PA1-066    | rabbit  | 1:100    |
| Rabbit IgG       | APC            | abcam         | ab232814   | rabbit  | 1:100    |
| Mouse IgG1       | FITC           | Sony          | 2630005    | mouse   | 1:500    |
| Armenian hamster | APC            | Sony          | 2604635    | hamster | 1:100    |
| Rat IgG2a        | APC            | Sony          | 2603115    | rat     | 1:100    |
| Rat IgG1         | AlexaFluor-647 | Sony          | 2602090    | rat     | 1:100    |
| REA control      | FITC           | Frank         | 104611     | human   | 1:100    |
| Rabbit IgG H&L   | Cy2            | abcam         | ab6940     | goat    | 1:1000   |
| Rabbit IgG H&L   | APC            | ThermoFisher  | 31984      | goat    | 1:500    |
| Rabbit IgG H&L   | AlexaFluor-647 | abcam         | ab150079   | goat    | 1:500    |
| Mouse IgG        | FITC           | invitrogen    | AB_2536524 | goat    | 1:1000   |
| Mouse IgG        | HRPO           | invitrogen    | AB_2536527 | goat    | 1:10000  |
| Rat IgG          | HRPO           | invitrogen    | AB_228356  | goat    | 1:10000  |
| streptavidin     | APC            | Sony          | 2626215    |         | 1:1000   |
| AnnexinV         | FITC           | Sony          | 3804530    |         | 1:500    |

## Supplementary Figure 1 Validation of the EVs based on MISEV proposal

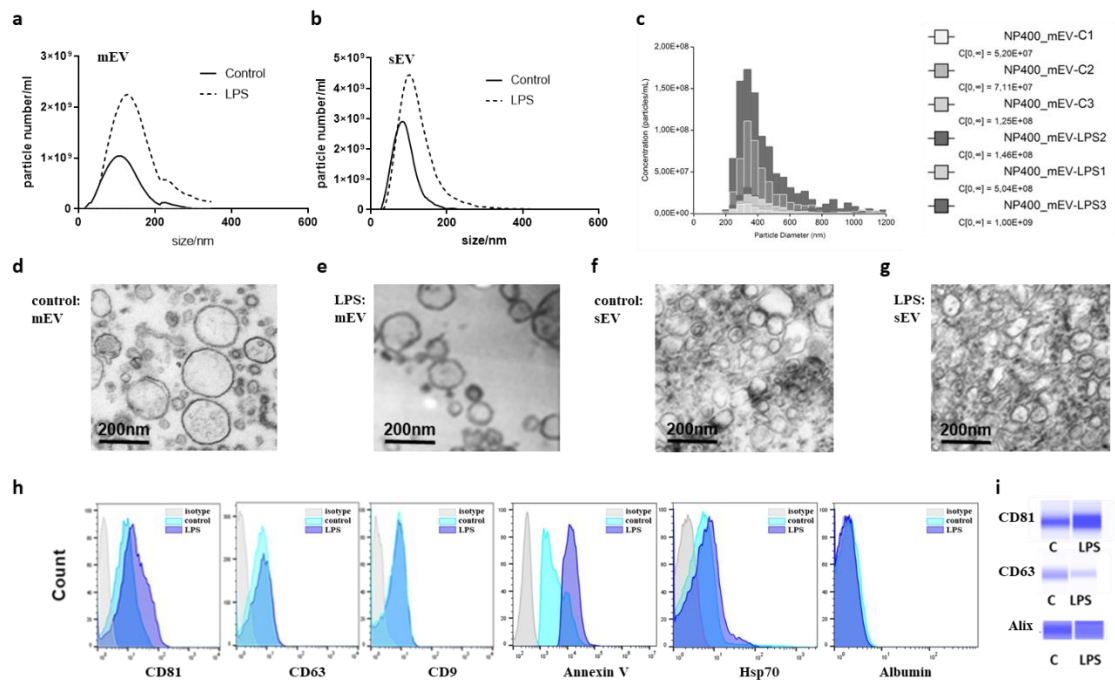

### Supplementary Fig. 1 Characterization of the mEVs by the MISEV2018 guidelines [3]

**a, b** shows concentration and particle sizes of platelet-free plasma EV fractions measured by NTA. **c** Size distribution of a 3-3 samples before and after LPS injection determined by qNano. **d-g** TEM images of control and LPS-challenged samples for both mEV and sEV fractions; **h** Flow cytometry histograms for five positive and one negative EV markers: light grey indicates the isotype control, light blue is the control, and violet shows the LPS group. **i** WES detection of three EV markers CD81= 22kDa, CD63= 30-65kDa, Alix= 95-105kDa.

**Supplementary Figure 2. Effect of LPS on inflammatory cell infiltration**

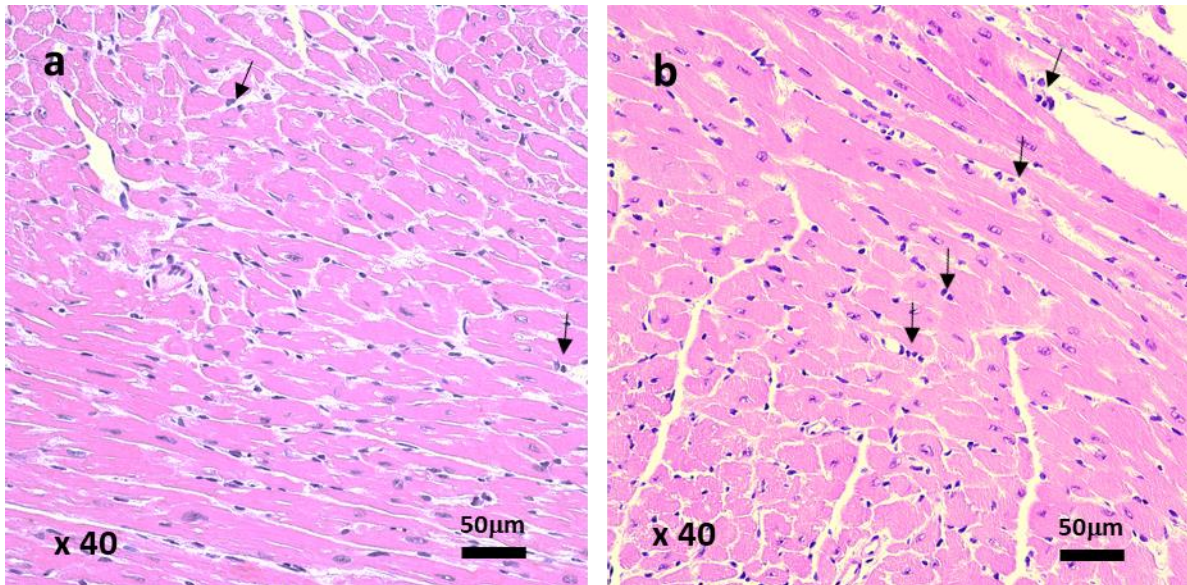

Heart histopathology H&E staining. Panels **a** on the left panel is example of control heart and on the right **b** is the images of the LPS group. Inflammatory cells pointed with black arrows. Magnification 40x (Eclips, Nikon).

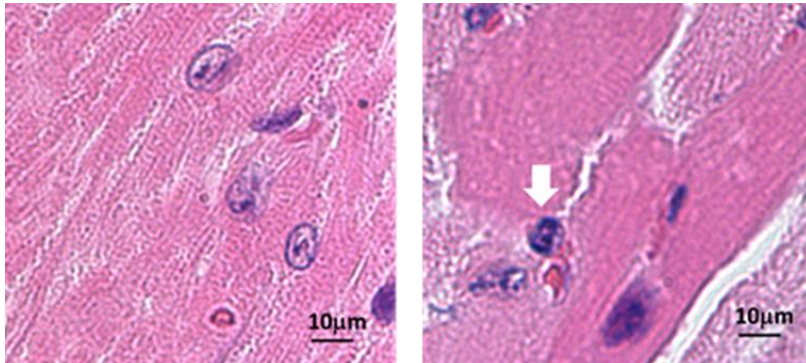

Representative images from formalin-fixed and paraffin-embedded sections (4-µm thickness) of mouse hearts stained with H&E. Twenty four h following LPS injection, diffuse leukocyte infiltration was observed in the hearts. The white arrow points to a granulocyte (objective magnification was 40 X and optical magnification was further 5X).

## Supplementary Table 2.

Echocardiographic evaluations were performed one day before (baseline), 6 and 24 hours after intraperitoneal injection of LPS or NaCl (n= 6 mouse/group).

|                     | Baseline       |  |                 |  | 6 hours        |  |                 |    | 24 hours        |  |                 |   |
|---------------------|----------------|--|-----------------|--|----------------|--|-----------------|----|-----------------|--|-----------------|---|
|                     | Vehicle        |  | LPS             |  | Vehicle        |  | LPS             |    | Vehicle         |  | LPS             |   |
| <b>BW (g)</b>       | 25,34 ± 1,89   |  | 23,45 ± 4,01    |  | 25,21 ± 1,65   |  | 22,64 ± 3,72    |    | 25,19 ± 1,76    |  | 20,97 ± 3,62    |   |
| <b>HR (b.p.m.)</b>  | 529,31 ± 23,43 |  | 508,37 ± 188,43 |  | 535,08 ± 27,76 |  | 516,48 ± 186,74 | *# | 505,89 ± 47,05  |  | 491,05 ± 174,29 |   |
| <b>LV mass (mg)</b> | 97,35 ± 26,25  |  | 95,14 ± 31,10   |  | 100,70 ± 28,67 |  | 107,39 ± 44,99  |    | 115,18 ± 22,50  |  | 90,91 ± 28,14   |   |
| <b>LVPWd (mm)</b>   | 0,84 ± 0,07    |  | 0,77 ± 0,28     |  | 0,81 ± 0,10    |  | 1,12 ± 0,49     | *# | 0,91 ± 0,07     |  | 0,83 ± 0,30     |   |
| <b>LVPWs (mm)</b>   | 1,38 ± 0,18    |  | 1,21 ± 0,42     |  | 1,31 ± 0,14    |  | 1,32 ± 0,57     |    | 1,35 ± 0,09     |  | 1,22 ± 0,43     |   |
| <b>LVAVd (mm)</b>   | 1,03 ± 0,15    |  | 0,96 ± 0,33     |  | 1,03 ± 0,25    |  | 0,92 ± 0,27     |    | 1,09 ± 0,12     |  | 0,95 ± 0,33     |   |
| <b>LVAVs (mm)</b>   | 1,72 ± 0,17    |  | 1,47 ± 0,50     |  | 1,64 ± 0,23    |  | 1,20 ± 0,40     | *# | 1,77 ± 0,20     |  | 1,53 ± 0,55     |   |
| <b>LVIDd (mm)</b>   | 3,56 ± 0,49    |  | 3,74 ± 1,26     |  | 3,70 ± 0,47    |  | 3,49 ± 1,24     |    | 3,74 ± 0,35     |  | 3,46 ± 1,21     |   |
| <b>LVIDs (mm)</b>   | 1,96 ± 0,57    |  | 2,25 ± 0,69     |  | 2,19 ± 0,56    |  | 2,81 ± 1,03     |    | 2,20 ± 0,35     |  | 2,03 ± 0,68     |   |
| <b>LVESV (μL)</b>   | 16,46 ± 7,71   |  | 19,96 ± 7,21    |  | 23,40 ± 11,62  |  | 32,16 ± 13,90   |    | 21,13 ± 11,41   |  | 19,34 ± 8,00    |   |
| <b>LVEDV (μL)</b>   | 47,69 ± 17,18  |  | 51,76 ± 15,48   |  | 58,17 ± 16,25  |  | 48,01 ± 17,21   |    | 55,26 ± 12,95   |  | 46,81 ± 15,86   |   |
| <b>FS (%)</b>       | 45,81 ± 7,38   |  | 39,86 ± 13,13   |  | 41,47 ± 7,55   |  | 20,41 ± 8,09    | *# | 41,27 ± 4,53    |  | 41,44 ± 14,33   |   |
| <b>SV (μL)</b>      | 31,23 ± 9,74   |  | 31,80 ± 9,72    |  | 34,77 ± 7,21   |  | 15,86 ± 5,62    | *# | 34,13 ± 4,00    |  | 27,47 ± 9,35    |   |
| <b>CO (mL/min)</b>  | 16,63 ± 5,66   |  | 16,08 ± 4,57    |  | 18,64 ± 4,21   |  | 8,26 ± 3,07     | *# | 17,22 ± 2,13    |  | 13,43 ± 4,49    |   |
| <b>E (mm/s)</b>     | 787,77 ± 75,51 |  | 818,23 ± 294,19 |  | 811,75 ± 65,57 |  | 565,91 ± 206,82 | *# | 751,21 ± 100,20 |  | 657,59 ± 217,11 | # |
| <b>IVCT (ms)</b>    | 15,22 ± 2,74   |  | 12,41 ± 4,14    |  | 12,98 ± 3,25   |  | 16,69 ± 5,32    |    | 11,97 ± 3,99    |  | 12,38 ± 4,68    |   |
| <b>e' (mm/s)</b>    | -26,87 ± 6,12  |  | -27,65 ± 12,98  |  | -26,36 ± 4,60  |  | -18,40 ± 9,68   | #  | -24,50 ± 5,42   |  | -18,25 ± 9,81   | # |
| <b>E/e'</b>         | -30,20 ± 5,01  |  | -29,65 ± 13,36  |  | -31,68 ± 6,74  |  | -31,54 ± 15,30  |    | -31,50 ± 5,69   |  | -38,11 ± 19,57  |   |

Two way anova with Tukey post-hoc test. \* and # represents p < 0.05 significance, \* VS Vehicle 6 hours, # VS LPS baseline

**Supplementary Figure 3. Representative frames from B-mode imaging (labeled PSLAX)**

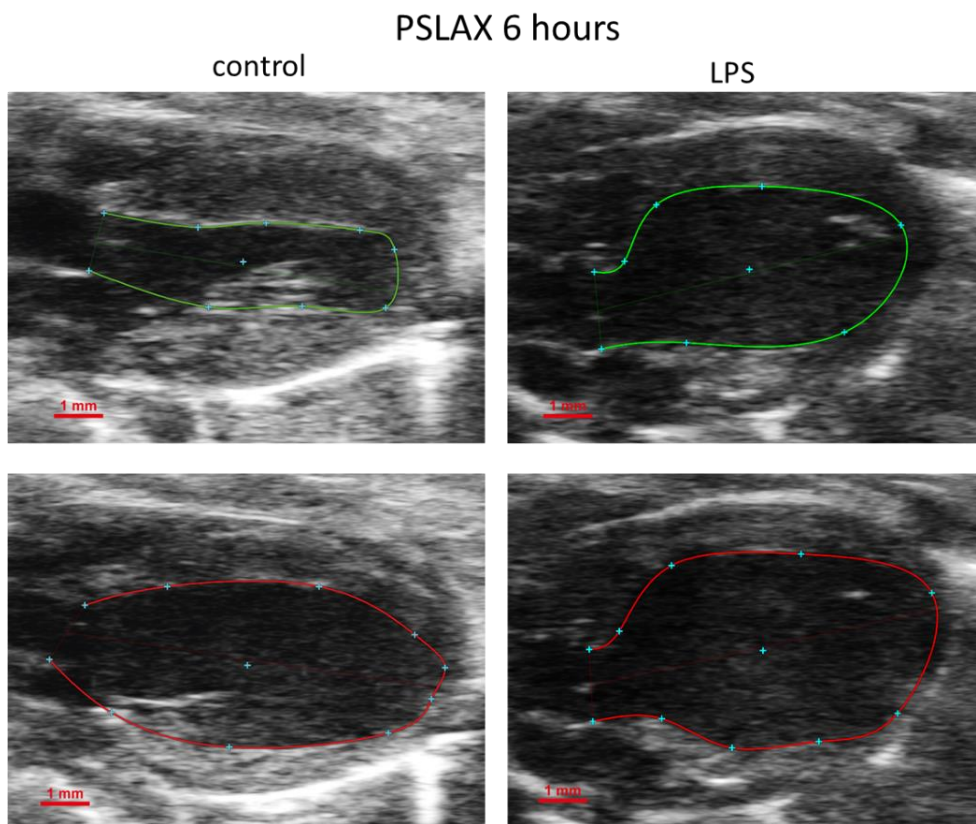

**Supplementary Fig. 3** Representative frames from B-mode imaging (labeled PSLAX) are shown for the two (control, LPS ) groups.

### Supplementary Figure 4. Confirmation of the cardiomyocyte nature of the isolated cells

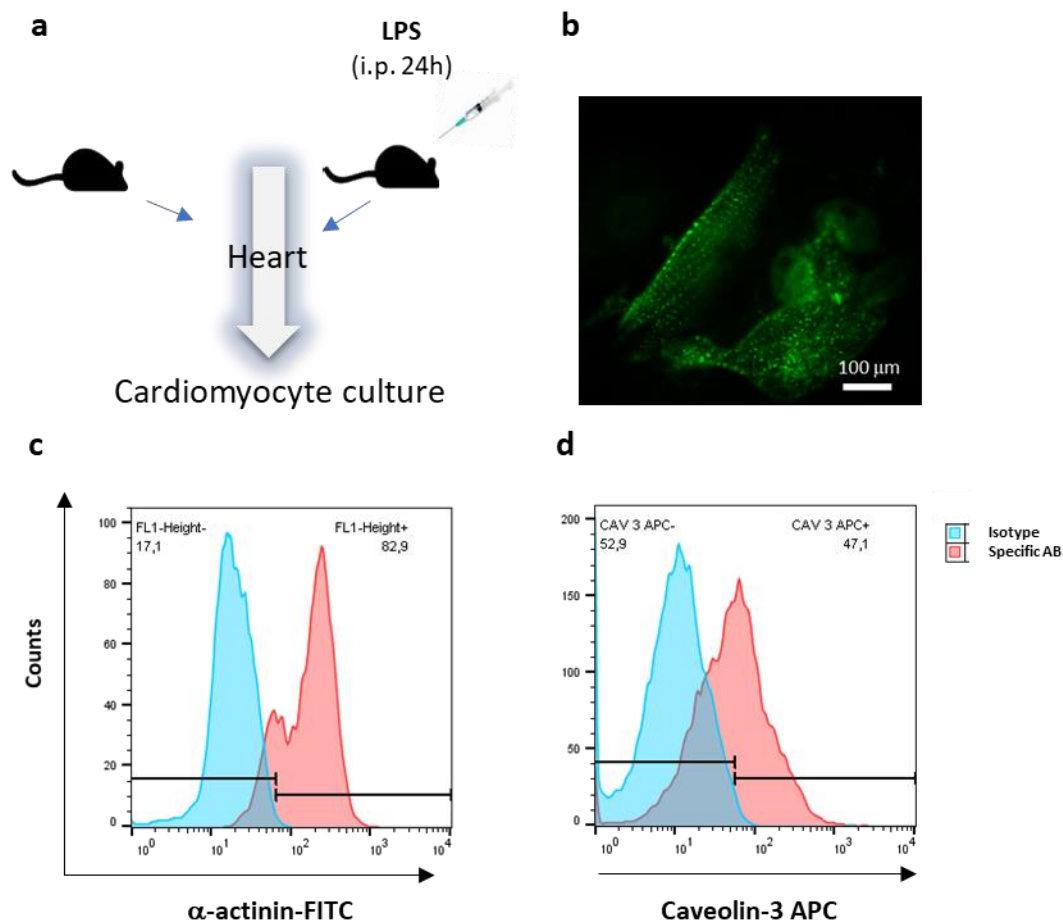

Experimental setup is outlined on Panel (a). The microscopy (Eclipse E600, Nikon) image of immunofluorescent stained cultured cardiomyocytes are shown on (b); the green fluorescent staining portrays  $\alpha$ -actinin-FITC. (c,d) representative flow cytometry histograms
